# Supplementary material
Source: publisher figshare collection journal article supplement (https://asha.figshare.com/articles/dataset/_/23739996)
Supplement: Supplementary file 1 [file 1]

**Supplemental Material S2.** Five-minute transcription of Spanish session.

*C = Child, A = Adult*

C (Um) yo quiero el globo de como azul y morado y ese **[Plataform utterance]**.

A Oh, si quieres el globo azul y morado entonces todos aparecen **[Sentence recast]**.

C Va va va arriba **[Plataform utterance]**!

A Si va arriba entonces se puede volar **[Sentence recast]**. ¿Que tenemos que hacer?

C Pónelo arriba porque va a volar **[Plataform utterance]**.

A Okay, si lo ponemos arriba entonces tal vez lo podemos hacer más chiquito **[Sentence recast]** y lo podemos poner al lado del arbol.

C Y pa la casa...

A Aja.

C Y si mi (mi mi) cara un>

C Yo quiero el otro porque aquí no está nada.

A ¿Okay, cual otro?

C Ese

A Este? Okay, bueno.

C Y agua porque tu va hacer mucho sed **[Plataform utterance]**.

A Ay si! Si quieres el agua entonces es para que no tengamos mucha sed **[Sentence recast]**.

C Mhm.

A Vamos a ponerlo en la mesa.

C Y?

A (Si necesitas) si tenemos mucha sed necesitamos mucha agua.

C Aja porque la agua sabe rico **[Plataform utterance]**!

A Si el agua está muy rica entonces es refrescante **[Sentence recast]**.

C Y yo quiero (el el mae\*) el manzana y un banana **[Plataform utterance]**.

A Si quieres la manzana y el banano entonces estas escogiendo las frutas **[Sentence recast]**. Yo creo>

C Y ese también!

A Aha, yo creo que voy a bajar la mesa y el sillón. Voy a bajarla aquí para que lo podemos ver mejor.

A Aquí esta el vaso de agua, la manzana, y...

C ¡La banana!

A Y el banano.

A Ooh! Estas son cosas muy saludables.

C Y (los zani\*) los zanahorias.

A Oh, ¿que hacemos con la zanahoria?

C Mhm, porque son bien rico los zanahorias y manzana y banana y zanahorias.

A Wow! Otra cosa muy saludable.

C Agua! Manzana! Banana! Y como se llama? Y (y los um) los este>

A Y la zanahoria?

C Aja y la zanahoria.

A Aja.

C Son cuatros saben ricos **[Plataform Utterance]**.

A Wow, son muchas cosas ricas si estas escogiendo cosas saludables **[Sentence recast]**.

C (Y) y pa cambiar.

A ¿Que más le ponemos? Mas X>

C Oh! Ya se, ya se! El otro!

C Okay, hay está! Un pelota.

A Oh.

C (Y un) y un bicicleta.

A Oh si quieres la bicicleta y la pelota <que van a hacer juntas>

C <Y dos carros> como son azul (y um) y roja.

A Ah, y el carro azul y rojo.

A Ay no! ¿Qué está pasando?

C Uh oh! Esta mucho cola **[Plataform utterance]**.

A Si, si hay mucha cola entonces hay muchos carros en tráfico **[Sentence recast]**.

C Mhm.

A ¿Que tenemos que hacer con los carros?

C (Ni) ni hace espacio y hace muy chiquito [**Platform utterance**].

A Mhm, si hay muchos carros tenemos que hacer más espacio [**Sentence recast**].
