# Supplementary material
Source: publisher figshare collection journal article supplement (https://asha.figshare.com/articles/dataset/_/23739996)
Supplement: Supplementary file 1 [file 1]

## Sheet: DataAvailability
Supplemental material, Castilla-Earls & Owen Van Horne, “Recast Therapy for Treating Syntax in Bilingual Children With Developmental Language Disorder: A Feasibility and Early Efficacy Study Examining the Role of Language of Intervention on Outcomes,” JSLHR, https://doi.org/10.1044/2023_JSLHR-22-00452
Supplemental Material S3. Study data.
Child	Dominance	Treatment	TestPoint	English Conditional	English Relative Clause	Spanish Conditional	Spanish Relative Clause
C004	English	Spanish	PreTest	2.664	0	4.329	0
			PostTest	8.325	0	1.332	0
C005	English	English	PreTest	3.663	0	0	0
			PostTest	4.329	7.326	1.665	0
C009	Balanced	Bilingual	PreTest	0	0	0	0
			PostTest	2.997	0.999	2.331	0
C016	Balanced	English	PreTest	0	0	0	0
			PostTest	0.666	0	2.997	0
C017	Balanced	Bilingual	PreTest	0	0	0	0
			PostTest	4.329	0	7.659	0
C018	English	English	PreTest	4.329	0	5.661	0
			PostTest	6.66	0	8.991	0
C019	Balanced	Spanish	PreTest	3.663	0	2.331	0
			PostTest	7.992	0	7.326	0
C022	Balanced	Spanish	PreTest	2.664	0	3.996	0.999
			PostTest	7.659	0	5.994	1.998
C023	Spanish	English	PreTest	0	0	0.333	0
			PostTest	1.665	0	4.329	0
C024	Balanced	English	PreTest	0	0	0	0
			PostTest	8.325	0	6.327	0
C025	Spanish	Bilingual	PreTest	4.329	0	4.995	0.999
			PostTest	6.66	0	6.993	0
C026	Balanced	English	PreTest	0	0	0.999	0
			PostTest	0	0	0.999	0
C028	Spanish	Bilingual	PreTest	0	0	0	0
			PostTest	0	0	0	0
C030	Spanish	Spanish	PreTest	0	0	0.333	0
			PostTest	2.997	0	0.999	0.999
C031	Balanced	Spanish	PreTest	0	0	0.666	0
			PostTest	9.324	0	9.324	0
