# Supplementary material
Source: publisher figshare collection journal article supplement (https://asha.figshare.com/articles/dataset/_/23739996)
Supplement: Supplementary file 2 [file 1]

## **Supplemental Material S1.** Five-minute transcription of English session.

*C = Child, A = Adult*

A All right, well I thought today we could do a dinosaur's story because we haven't done stories in a little while. And I'll show you the stickers I have as long as it's not freezing. Let's see if it's gonna behave.

A Okay, can you see it okay?

A We're going to make a dinosaur story today.

C Hmm.

A Okay, so we have a lake. We have the trees. We have the mountains in the back. (What kind of um) How do we want to start this story?

C I want to start the story with a duck in the pond.

A Okay, let's see if I have a duck. I don't have a duck but I have this tiny small dinosaur. So, like maybe he starts and he's in the pond. Well, if he's in the pond, what is he thinking about?

C Getting a fish **[Platform utterance]**!

A Ooh, he's thinking about getting a fish if he's in the pond **[Sentence recast]** Maybe he's feeling so hungry he wants to catch a little fish, but then all of a sudden when a fish starts coming out...ahhh!

A Oh no. What happens?

C He's gonna get the food.

A He's gonna get the food!

C He's gonna eat him!

A Do you think, if he see the fish, would he eat the fish or the dinosaur?

C (He would, he would eat the) He would eat the dinosaur **[Platform utterance]**.

A He would eat the dinosaur if he is really hungry **[Sentence recast]**. Yeah, that might be a better snack. Ok, I am going to put him on top. Oh oh! Let's see what happens next.

A And he if sees this Tyrannous eating the other dinosaur, what do you he is going to do?

C (He could) The dinosaur would eat the bird **[Platform utterance]**.

A Yeah, the dinosaur would eat the bird if he sees him so close to the ground  
**[Sentence recast]**.

A Ok let me see. I wonder what is going to happen next. Maybe we need more dinosaurs. Let me show you which ones I have and you can tell which ones we should do next. Which one do you like next?

C The dinosaur.

A I got a blue dinosaur and a purple dinosaur

C Purple.

A He kind of looks like a T-Rex to me. This dinosaur really does not stand up. It looks like he is bending down. If he is bending down, what do you think>

C yeah.

A What do you think he is doing if he is bending down?

C He going to drink some water **[Platform utterance]**.

A If he bends down, he is going to drink some water **[Sentence recast]**. So he notices that all these guys are eating each other over there. I wonder what he thinks.

C I think that the red dinosaur would eat the purple dinosaur **[Platform utterance]**.

A Oh, If the red dinosaur eats the purple dinosaur they are probably going to fight first **[Sentence recast]** because they are both pretty big. He stands up but, look! oh my gosh! His teeth are so much bigger and he tries to bite him back.

A What would you think happens next?

A What do you think? Maybe they are making so much noise that another dinosaur comes along. Here comes another one

A Oh oh. Hey if these two dinosaurs are do you think they are family?

C yeah.
